# Supplementary material for: Rv0579 Is Involved in the Resistance to the TP053 Antitubercular Prodrug
Source: PubMed Central journal article supplement (PMC7052010; doi:10.3389/fmicb.2020.00292), 2020-02-25
Supplement: Data_Sheet_1.pdf [file Data_Sheet_1.pdf]

## Supplementary Material

### 1 Supplementary Data

#### Synthesis of 11526119

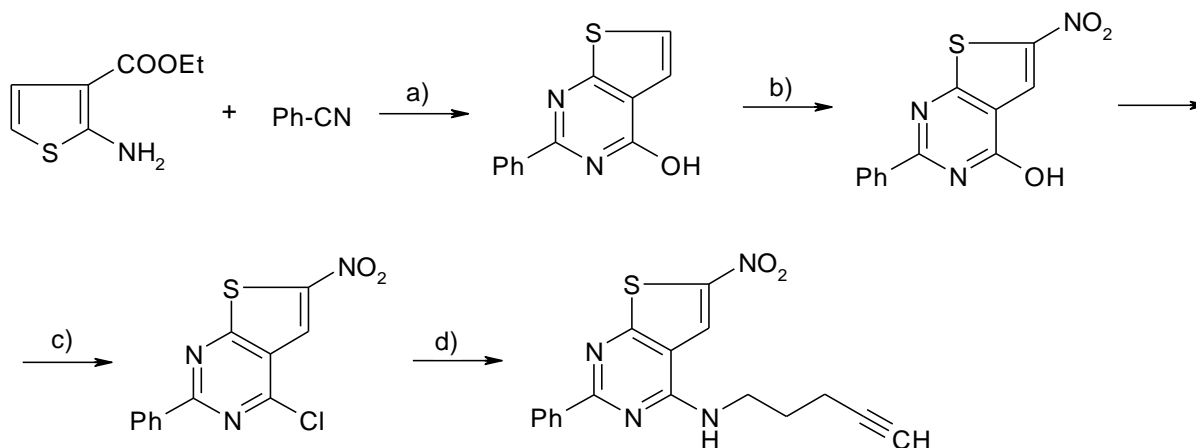

- a) A mixture of ethyl 2-aminothiophene-3-carboxylate (4 g, 23.4 mmol) and benzonitrile (2.5 mL, 24.4 mmol) in dioxane solution of hydrochloric acid (~21 %, 55 ml) in glass bomb was mixed at 110°C for 6 h. The heating was discontinued and reaction masse was mixed additional 16 h at 20°C. Formed solid was filtered off, washed by dioxane, water and methanol. 2-Phenylthieno[2,3-d]pyrimidin-4-ol was used in the next step without additional purification. Yield is 30%. Mp. 238-40°C. Mass (EI),  $m/z$  ( $I_{relat.}(\%)$ ): 229.2708 [M]<sup>+</sup> (76). C<sub>12</sub>H<sub>8</sub>N<sub>2</sub>OS. <sup>1</sup>H NMR (DMSO-d<sub>6</sub>),  $\delta$ : 12.70 (br s, 1H, OH), 8.15 (m, 2H, 2CH), 7.55 (m, 4H, 4CH), 7.42 (d, 1H,  $J = 6.0$  Hz, CH) ppm.
- b) Solid 2-phenylthieno[2,3-d]pyrimidin-4-ol (1.14 g, 5 mmol) was solved in conc. sulfuric acid (15 ml), stored for 40 min at 20°C, cooled to -10°C and treated by small portions by solid potassium nitrate (0.6 g, 6 mmol), with temperature inside reaction not more than -5°C. The reaction masse was hold at this temperature additional 30 min and mixed with ice. Formed solid of 6-nitro-2-phenylthieno[2,3-d]pyrimidin-4-ol was washed by water till pH ~7 and used in the next step without additional purification. Yield is 89%. Mp. 321-3 °C. Mass (EI),  $m/z$  ( $I_{relat.}(\%)$ ): 274.2684 [M]<sup>+</sup> (45). C<sub>12</sub>H<sub>7</sub>N<sub>3</sub>O<sub>3</sub>S. <sup>1</sup>H NMR (DMSO-d<sub>6</sub>),  $\delta$ : 13.20 (br s, 1H, OH), 8.30 (s, 1H, CH), 8.17 (d, 2H, 2 CH), 7.60 (m, 3H, 3 CH) ppm.
- c) A mixture of 6-nitrothieno[2,3-d]pyrimidine-4-ol (1.80 g, 6.54 mmol), phosphorus oxichloride (18 eq.) and triethylamine hydrochlorided (0.83 g, 6.0 mmol) was refluxed for 1 h. The reaction masse was cooled, poured onto ice, formed solid was filtered off. The yield of 4-chloro-6-nitro-2-phenylthieno[2,3-d]pyrimidine is 99%. Mp. 210-3°C. Mass (EI),  $m/z$  ( $I_{relat.}(\%)$ ): 292.7138 [M]<sup>+</sup> (62). C<sub>12</sub>H<sub>6</sub>ClN<sub>3</sub>O<sub>2</sub>S. <sup>1</sup>H NMR (CDCl<sub>3</sub>),  $\delta$ : 8.55 (m, 2H, 2CH), 8.26 (s, 1H, CH), 7.58 (m, 3H, 3CH) ppm.

- d) Solution of 4-chloro-6-nitro-2-phenylthieno[2,3-d]pyrimidine (0.1 g, 0.34 mmol) in dioxane (5 ml) was treated by solution of pent-4-yn-1-amine (0.056 g, 0.64 mmol) in MeOH (1.5 ml) at 20°C. After 30 min the reaction mixture was evaporated on vacuum and residue was treated by water. Solid precipitate was filtered off and washed by water and methanol. The yield of 6-nitro-N-pent-4-yn-1-yl-2-phenylthieno[2,3-d]pyrimidin-4-amine is 64%. Mp. 232-4°C (EtOAc). Mass (EI),  $m/z$  ( $I_{relat.}$  (%)): 339.3848  $[M]^+$  (76).  $C_{17}H_{14}N_4O_2S$ .  $^1H$  NMR (DMSO- $d_6$ ),  $\delta$ : 8.80 (br s, 1H, NH), 8.30 (br s, 1H, CH), 8.40 (m, 2H, 2CH), 7.50 (br s, 3H, 3CH), 3.75 (br d, 2H,  $CH_2$ ), 2.75 (br s, 1H, CH), 2.30 (br s, 2H,  $CH_2$ ), 1.85 (m, 2H,  $CH_2$ ) ppm.

## 2 Supplementary Figures and Tables

**TABLE S1** | Oligonucleotides used in this study.

| Oligonucleotide      | Sequence 5'-3'                                                          | Purpose                                       |
|----------------------|-------------------------------------------------------------------------|-----------------------------------------------|
| <b>sigAF</b>         | GATGACGACGAGGAGAT                                                       | Real-Time PCR of <i>sigA</i>                  |
| <b>sigAR</b>         | GCCGATCTGTTTGAGGTA                                                      |                                               |
| <b>0579rtF</b>       | GACGTCAACCTCGGCCAG                                                      | Real-Time PCR of <i>Rv0579</i>                |
| <b>0579rtR</b>       | GAATTCGCTGCTCGCCCA                                                      |                                               |
| <b>Rv0579rec</b>     | AGTTAGCTGGTCCCGCAGTCGTTCGACGA<br><u>CGCGAACCAACCGTGCGTGGTGAGATCCCGG</u> | Insertion of c718g mutation by recombineering |
| <b>0579SumoFor</b>   | ATGGTCGGCTATGTGGA                                                       | Cloning of Rv0579 in pET-SUMO vector          |
| <b>0579SumoRev</b>   | TCAGGTCGAAGTAGTTAG                                                      |                                               |
| <b>Rv2466cseqFor</b> | GGAACAGGTGCGGGGCGG                                                      | Sequencing of <i>mrx2</i> ( <i>Rv2466c</i> )  |
| <b>Rv2466cseqRev</b> | TGCCCGACATTGTGCCCG                                                      |                                               |
| <b>Rv0579seqFor</b>  | TGCTTCGGCTGTTGGGCT                                                      | Sequencing of <i>Rv0579</i>                   |
| <b>Rv0579seqRev</b>  | CATTGGTGGCGGGGACA                                                       |                                               |

**TABLE S2** | MIC to TP053 of *M. tuberculosis* recombineering mutants.

| <b>Number of TP053 resistant colonies obtained by recombineering</b> | <b>Concentration of isolation (TP053, µg/ml)</b> | <b>Mutation observed in <i>Rv0579</i> after recombineering (nucleotidic change)</b> | <b>MIC to TP053 (µg/ml)</b> |
|----------------------------------------------------------------------|--------------------------------------------------|-------------------------------------------------------------------------------------|-----------------------------|
| 4                                                                    | 1.25 (10X MIC)                                   | C718G                                                                               | 2.5<br>(20X MIC)            |
| 1                                                                    | 5 (40X MIC)                                      | C718G                                                                               | 2.5<br>(20X MIC)            |

**TABLE S3** | Expression levels of *Rv0579* in *M. tuberculosis* wild type and mutant strains.

| <i>M. tuberculosis</i> strains | <i>Rv0579</i> | <i>Rv0581</i><br>(antitoxin) | <i>Rv0582</i><br>(toxin) |
|--------------------------------|---------------|------------------------------|--------------------------|
| H37Rv                          | 1.00 ± 0.028  | 1.00 ± 0.015                 | 1.00 ± 0.01              |
| Rec5                           | 0.93 ± 0.011  | <b>2.71 ± 0.14</b>           | 6.02 ± 0.18              |
| H37Rv + TP053 (0.5X MIC)       | 1.33 ± 0.11   | 0.50 ± 0.03                  | <b>12.31 ± 0.23</b>      |
| Rec5 + TP053 (0.5X MIC)        | 0.73 ± 0.17   | <b>2.37 ± 0.08</b>           | 2,58 ± 0.057             |

**TABLE S4** | Characteristics of Rv0579 protein (252 aa).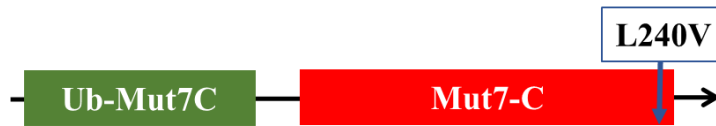

| Domain   | Description of Family domain                                                                              | Start | End  |
|----------|-----------------------------------------------------------------------------------------------------------|-------|------|
| Ub-Mut7C | This domain is found at the N-terminus of bacterial proteins with Mut7-C, suggesting an RNA-binding role. | 2     | 82   |
| Mut7-C   | RNAse domain of the PIN fold with an inserted Zinc Ribbon at the C terminus.                              | 97    | 241* |

\* The mutation is L240V.

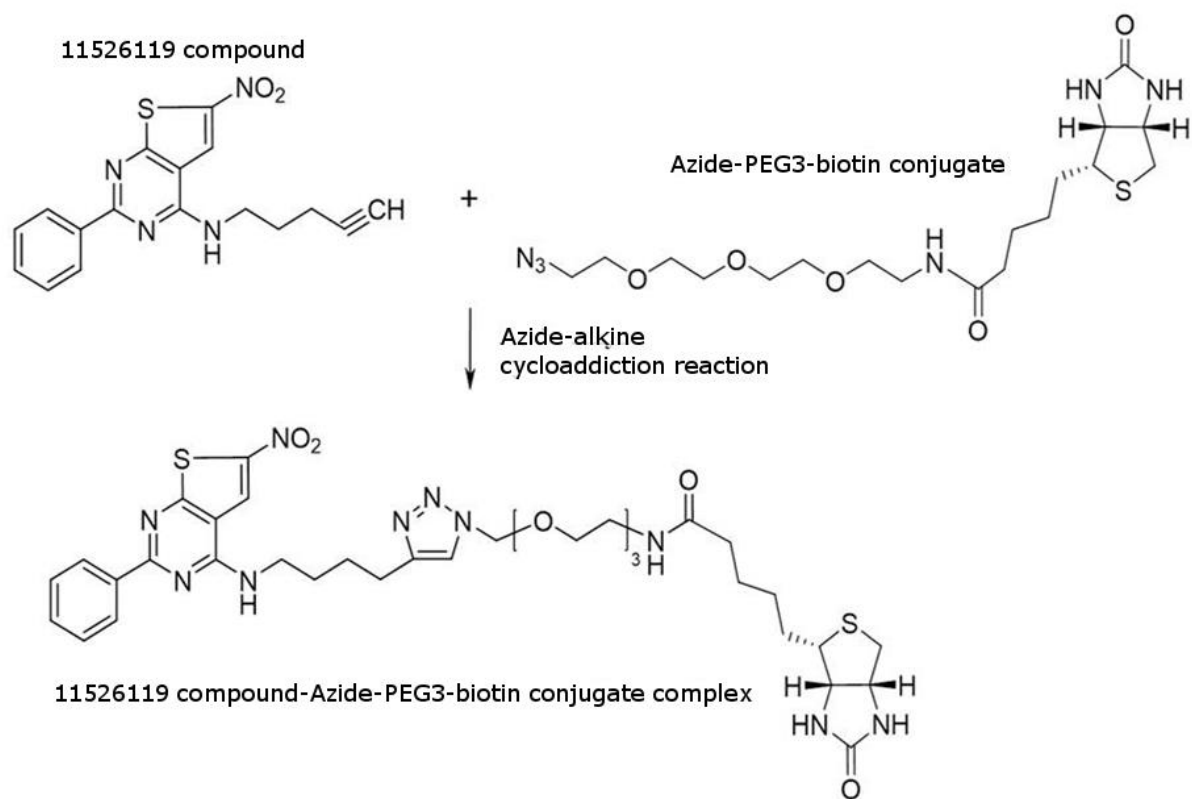

**Figure S1. Cycloaddition reaction of 11526119 compound with Azide-PEG3-biotin conjugate.**

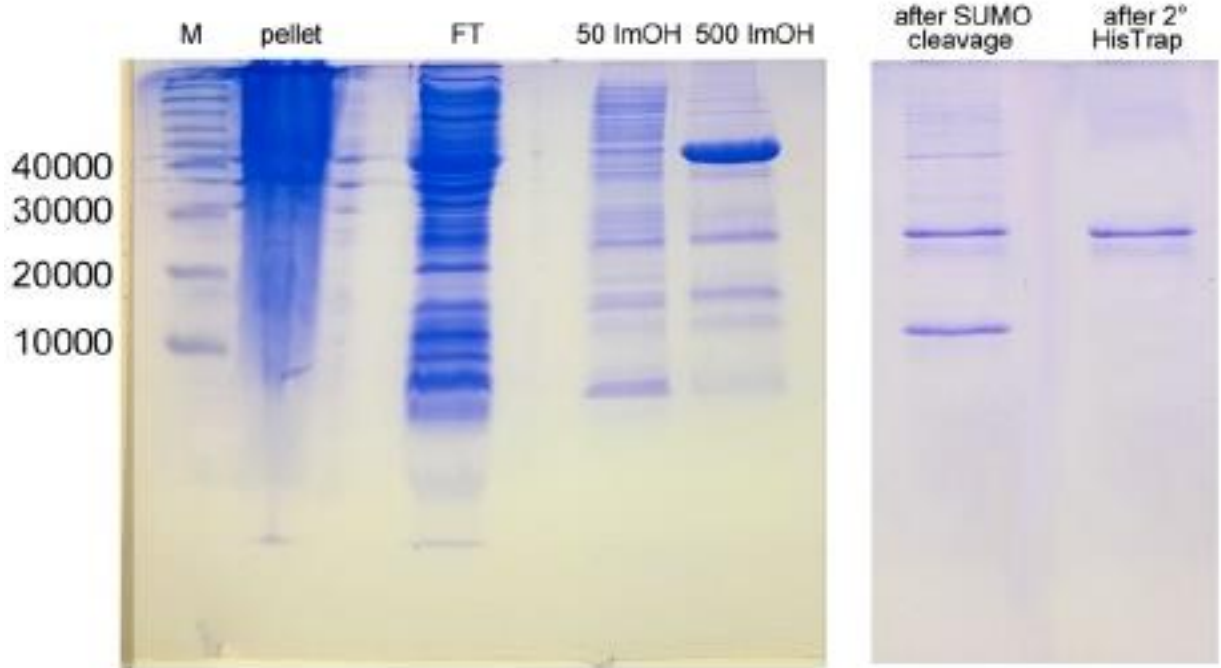

**Figure S2. SDS-PAGE of the Rv0579 purification steps.**



1 2 3

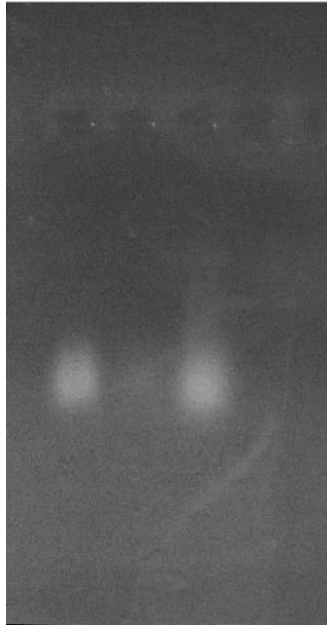

**Figure S3. 1% agarose gel electrophoresis of the purified Rv0579 protein, before (lane 1) and after digestion with RNase (lane 2) or DNase (lane 3).** Purified Rv0579 was incubated for 5 minutes at 90°C, then after nuclease addition the samples were incubated at 37°C for 10 minutes and analyzed.



**Figure S4. Alignment by ClustalW of Rv0579 with some orthologues bacterial proteins.**

In green is indicated the position of mutation in Rv0579. In the alignment there are the following proteins: SCO4976 of *Streptomyces coelicolor* A3(2); PilT\_Nostoc of *Nostoc punctiforme* NIES-2108; DUF82\_Nostoc of *Nostoc punctiforme*; TM0779 of *Thermotoga maritima* MSB8; DUF82\_Solibacter of *Solibacter usitatus*; NFA\_28300 of *Nocardia farcinica* IFM 10152; BH05\_12860 of *Thermobifida fusca*; PilT-Burkholderia of *Burkholderia cenocepacia*; RBRH\_03075 of *Paraburkholderia rhizoxinica* HKI 454; DUF82\_Ralstonia of *Ralstonia solanacearum* PSI07 (plasmid); PilT\_Nitrosospira of *Nitrosospira multiformis*; DUF82\_Nitrosospira of *Nitrosospira multiformis* ATCC 25196; PilT\_Thiobacillus of *Thiobacillus denitrificans*.
